# Supplementary material for: Expansion of human γδ T cells for adoptive immunotherapy using a bisphosphonate prodrug
Source: PubMed Central journal article supplement — Cancer Sci. 2018 Feb 4;109(3):587–99. doi: 10.1111/cas.13491 (PMC5834800; doi:10.1111/cas.13491), 2018-02-04
Supplement: CAS-109-587-s001.pdf [file CAS-109-587-s001.pdf]

# **Expansion of human $\gamma\delta$ T cells for adoptive immunotherapy using a bisphosphonate prodrug**

Yoshimasa Tanaka, Kaoru Murata-Hirai, Masashi Iwasaki, Kenji Matsumoto, Kosuke Hayashi, Asuka Kumagai, Mohanad H. Nada, Hong Wang, Hirohito Kobayashi, Hiroshi Kamitakahara, Haruki Okamura, Tomoharu Sugie, Nagahiro Minato, Masakazu Toi, and Craig T. Morita

## **Supplemental Information**

**Table S1.**  
**Characteristics of the prostate cancer patients studied in this report.**

| <b>Patient</b>          | <b>PC01</b>                                 | <b>PC02</b>       | <b>PC03</b>      | <b>PC04</b>                    | <b>PC05</b>                    |
|-------------------------|---------------------------------------------|-------------------|------------------|--------------------------------|--------------------------------|
| <b>Age at diagnosis</b> | 75                                          | 75                | 87               | 76                             | 73                             |
| <b>Initial PSA</b>      | 79.79                                       | 35.27             | 37.86            | 8.52                           | 263                            |
| <b>Gleason's score</b>  | 4 + 4 = 8                                   | 5 + 4 = 9         | 3 + 3 = 6        | 5 + 4 = 9                      | 3 + 4 = 7                      |
| <b>Clinical stage</b>   | cT2bN0M0                                    | cT3aN0M0          | cT2aN0M0         | cT3aN1M0                       | cT3bN0M0                       |
| <b>D'Amico risk</b>     | High risk                                   | High risk         | Low risk         | High risk                      | High risk                      |
| <b>Initial therapy</b>  | Radical prostatectomy                       | Radiation therapy | Hormonal therapy | Radiation therapy              | Radiation therapy              |
| <b>Prognosis</b>        | Salvage radiation therapy, hormonal therapy | No recurrence     | Stable PSA       | Hormonal therapy, chemotherapy | Hormonal therapy, chemotherapy |

**Table S2.**  
**Characteristics of the breast cancer patients studied in this report.**

| <b>Patient</b>                         | <b>BC29</b>      | <b>BC33</b>     | <b>BC35</b> | <b>BC36</b> | <b>BC37B</b> | <b>BC38</b> | <b>BC42</b> |
|----------------------------------------|------------------|-----------------|-------------|-------------|--------------|-------------|-------------|
| Age at diagnosis                       | 41               | 41              | 46          | 62          | 59           | 56          | 54          |
| Characteristics                        | IDC <sup>†</sup> | MBC             | IDC         | DCIS        | MBC          | IDC         | IDC         |
| TNM classification                     | T2N0<br>M0       | N/A             | T1N0<br>M0  | TisN0<br>Mx | TD1N0<br>M1  | T2N0<br>M0  | T1N0<br>M0  |
| Clinical stage                         | 2                | 4               | 1           | 0           | 4            | 2           | 1           |
| Pathological subtype                   | pap-tub          | N/A             | pap-tub     | DCIS        | sci          | pap-tub     | sci         |
| Clinical grade                         | G1               | N/A             | G1          | N/A         | G2           | G1          | G1          |
| Estrogen receptor (ER) expression      | 100              | 0               | 100         | N/A         | 100          | 100         | 100         |
| Progesterone receptor (PgR) expression | 100              | 0               | 100         | N/A         | 100          | 100         | 100         |
| HER2 expression                        | 0                | 0               | 0           | N/A         | 0            | 0           | 0           |
| Ki-67 expression                       | 5%               | 50%             | <1%         | N/A         | 15%          | <5%         | <5%         |
| Molecular Subtype                      | Lum A            | Triple negative | Lum A       | N/A         | Lum A        | Lum A       | Lum A       |

<sup>†</sup>Abbreviations used: DCIS, ductal carcinoma in situ; ER, estrogen receptor; HER2, human epidermal growth factor 2, IDC, invasive ductal carcinoma; Lum A, luminal A; MBC, metastatic breast cancer; N/A, not available; pap-tub, papillotubular carcinoma; PgR, progesterone receptor; sci, scirrhous carcinoma.

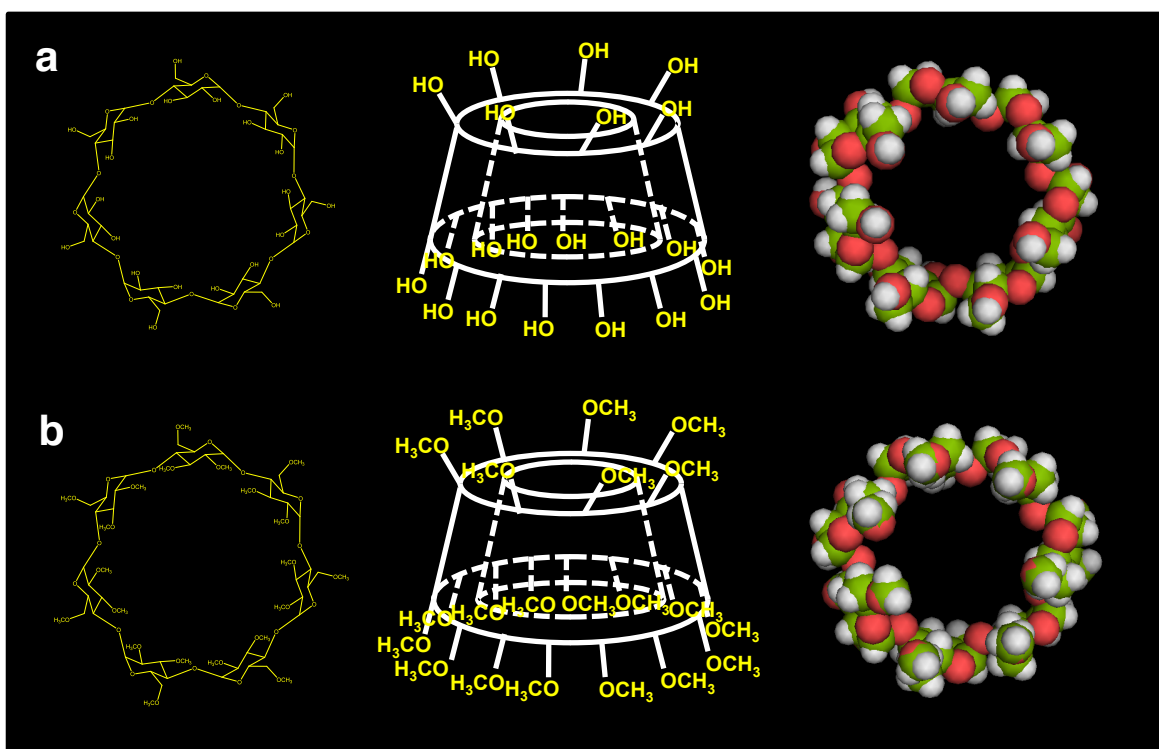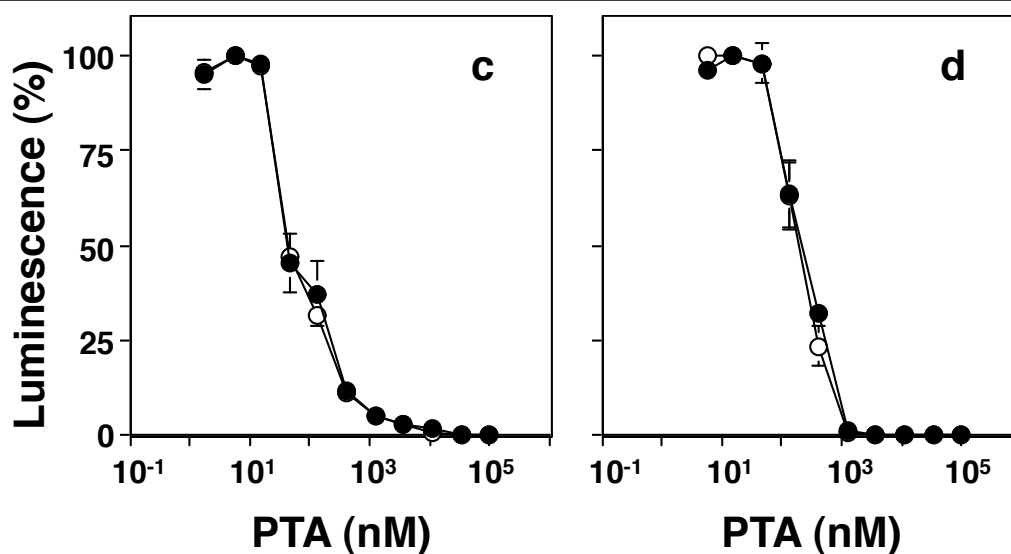

**Figure S1. Solubilization of PTA with trimethyl  $\beta$ -cyclodextrin in ethanol.** (a) Structure of  $\beta$ -cyclodextrin ( $\beta$ CD). Structural formula of  $\beta$ CD (left), schematic diagram of  $\beta$ CD (middle), and space-filling model of  $\beta$ CD (right) are shown. (b) Structure of trimethyl  $\beta$ -cyclodextrin (TM $\beta$ CD). Structural formula of TM $\beta$ CD (left), schematic diagram of TM $\beta$ CD (middle), and space-filling model of  $\beta$ CD (right) are shown. (c, d) Effect of TM $\beta$ CD solubilization on PTA inhibition of the proliferation of EJ-1 bladder carcinoma and U937 histiocytic lymphoma cells. EJ-1 (c) or U937 (d) cells were incubated with PTA that had been solubilized either in TM $\beta$ CD with ethanol (open circles) or in dimethylsulfoxide (solid circles). After 4 days of culture, cell growth was determined by measuring cellular ATP using a luciferase assay. Note that PTA exhibited identical activity with either method of solubilization.

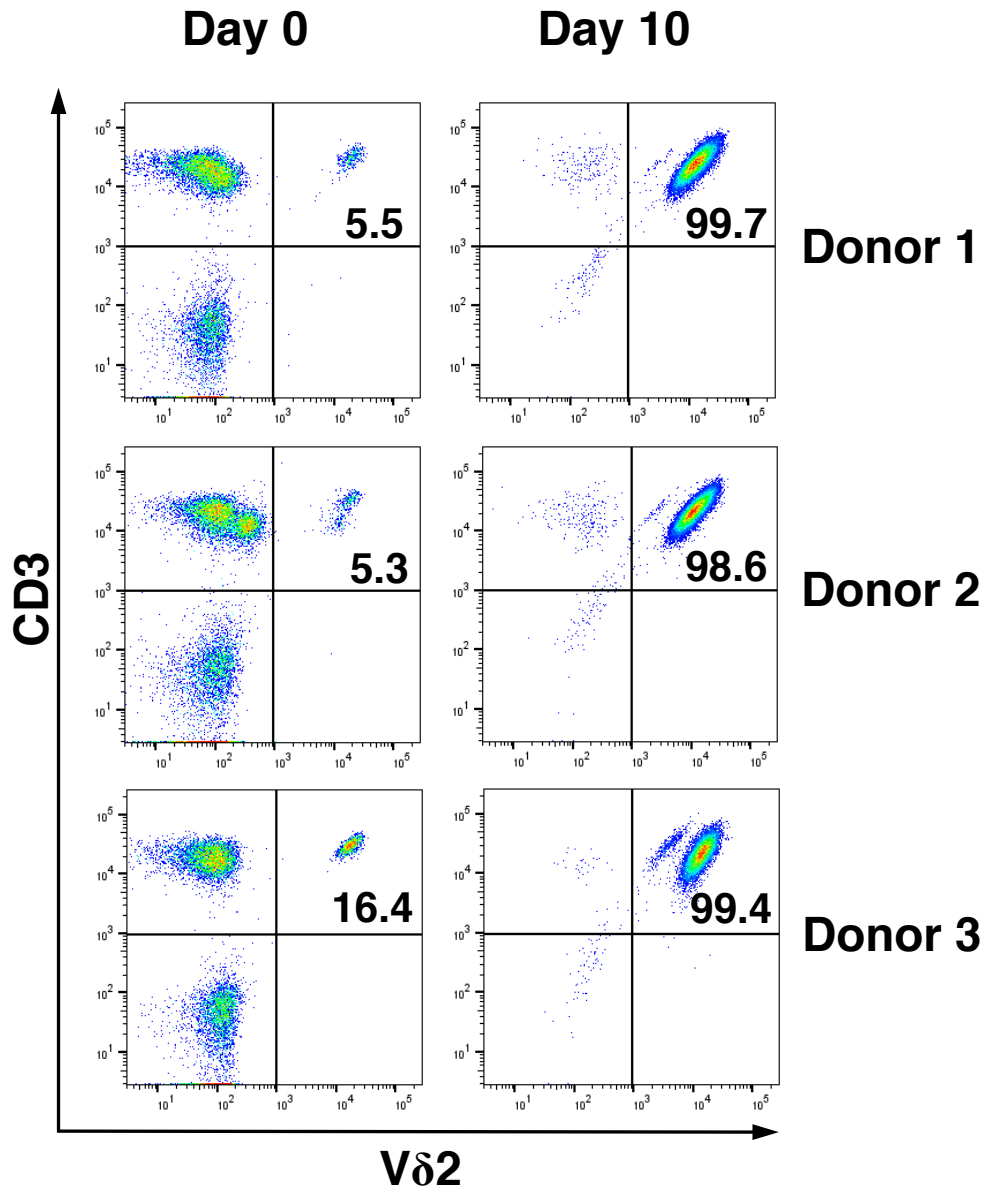

**Figure S2. Expansion of V $\gamma$ 2V $\delta$ 2 T cells from healthy donors using PTA with IL-2.** PBMC derived from healthy adult donors were stimulated with PTA and IL-2 for 10 days in vitro. The cells were then harvested, stained with mAbs to V $\delta$ 2 and CD3, and analyzed by flow cytometry. Dot plots for the starting populations (left panels) and the ending populations (right panels) are shown. Numbers represent V $\delta$ 2 T cells as a percent of CD3 T cells. The absolute number of V $\delta$ 2 T cells increased from  $4.1 \times 10^5$  to  $4.7 \times 10^8$  for Donor 1,  $1.7 \times 10^5$  to  $9.2 \times 10^7$  for Donor 2, and  $2.1 \times 10^5$  to  $7.0 \times 10^7$  for Donor 3, with the expansion rates being 1,134-fold, 550-fold, and 329-fold, respectively.

## V $\delta$ 2 T cells in NOG mouse blood

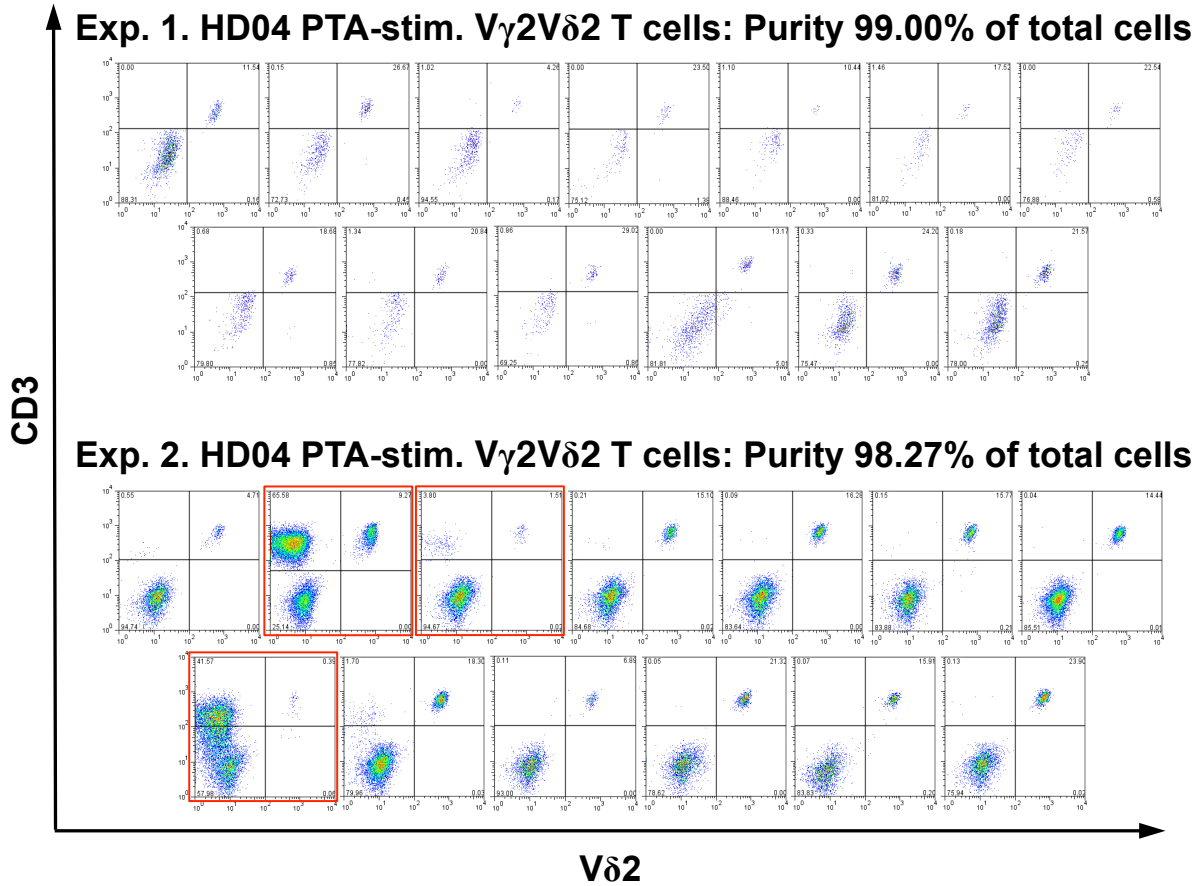

**Figure S3. Purity of V $\gamma$ 2V $\delta$ 2 T cells from a healthy donor helps to determine the success of engraftment in the blood of NOG mice after adoptive transfer.** PBMC derived from a single healthy donor were stimulated with PTA and IL-2. After 10 days, V $\delta$ 2 T cells constituted 99.64% in Exp. 1 and 99.58% in Exp. 2 of total cells in the lymphocyte gate.  $5 \times 10^7$  expanded V $\gamma$ 2V $\delta$ 2 T cells (never frozen) were i.p. injected into each of 13 NOG mice. Fourteen days later, peripheral blood was obtained, treated with ACK lysis buffer, and washed with PBS/2% FCS. The resulting cells were then stained with mAbs to the V $\delta$ 2 TCR and human CD3 and analyzed by flow cytometry. Two experiments are shown (top and bottom panels). Mean  $\pm$  SD of V $\gamma$ 2V $\delta$ 2 T cells as a percent of total cells in the lymphocyte gate were for Exp. 1.  $18.8\% \pm 7.1\%$ ,  $n = 13$  Exp. 2.  $12.6\% \pm 7.4\%$ ,  $n = 13$ . Each dot plot represents one NOG mouse. Mice with less than 80% V $\gamma$ 2V $\delta$ 2 T cells of total T cells are outlined in red.

## V $\delta$ 2 T cells in NOG mouse blood

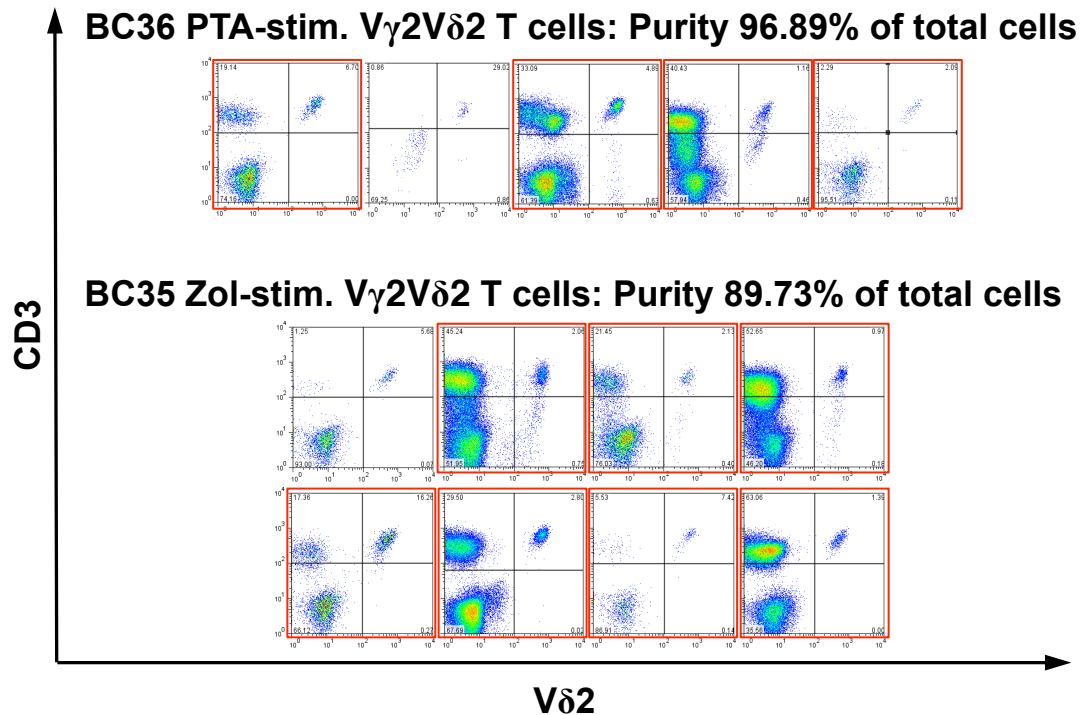

**Figure S4. Purity of V $\gamma$ 2V $\delta$ 2 T cells from breast cancer patients helps to determine the success of engraftment in NOG mice after adoptive transfer (continued).** PBMC derived from two breast cancer patients were stimulated with either PTA and IL-2 (BC36) or Zol and IL-2 (BC35). After 10 days, V $\delta$ 2 T cells constituted 96.89% and 89.73% of total cells in the lymphocyte gate, respectively and were frozen for later transfer. For transfer, cells were thawed and  $5 \times 10^7$  V $\gamma$ 2V $\delta$ 2 T cells were i.p. injected into each of 5 NOG mice for BC36 and 8 NOG mice for BC35. Fourteen days later, peripheral blood was obtained, treated with ACK lysis buffer, and washed with PBS/2% FCS. The resulting cells were then stained with mAbs to the V $\delta$ 2 TCR and human CD3 and analyzed by flow cytometry. Each dot plot represents one NOG mouse. Mice with less than 80% V $\gamma$ 2V $\delta$ 2 T cells of total T cells are outlined in red.
